# Supplementary material for: Performance analysis of multiprocessor systems in a distributed large data set model using generalised stochastic petri nets
Source: publisher site journal article supplement (doi:10.18632/aging.103931), 1995-01-01
Supplement: Supplementary file [file aging-v12i19-103931-supplementary-material-SD1.pdf]

**SUPPLEMENTARY FIGURE**

**A**

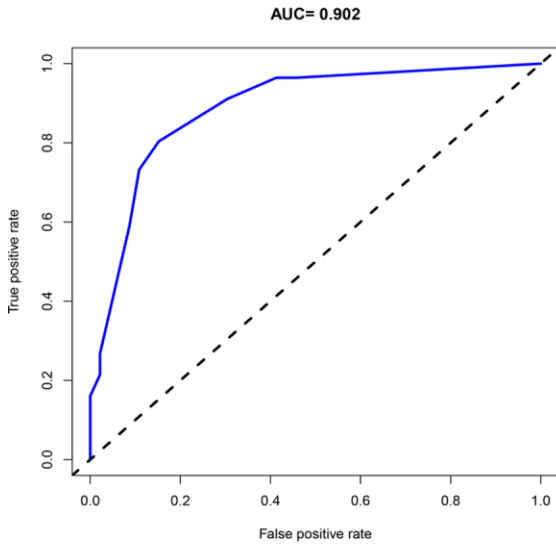

**B**

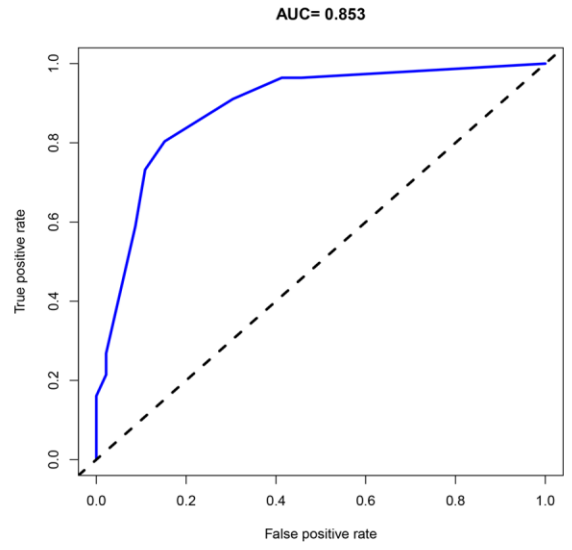

**C**

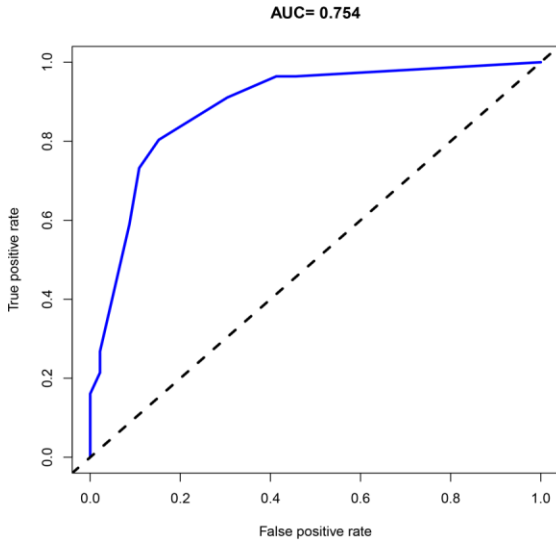

**D**

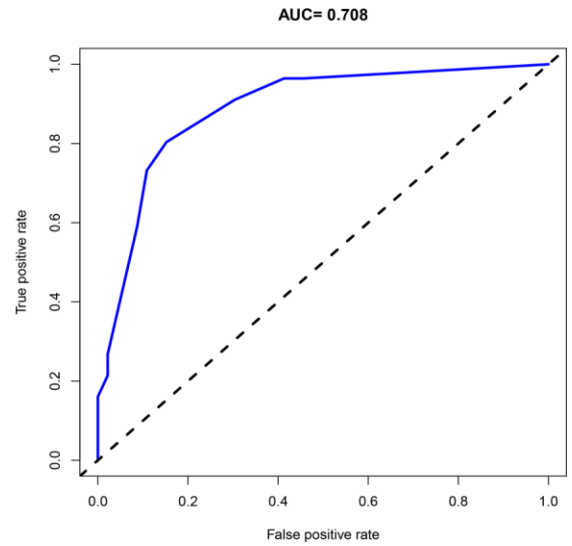

**Supplementary Figure 1. Predictive value of four different models.** Our prediction model (A); NLR (B), MuLBSTA (C) and CURB-65 (D).
